# Supplementary material for: Spatial and Ontogenetic Patterns in the Trophic Ecology of Juvenile Bull Sharks (Carcharhinus leucas) From the Northwest Gulf of Mexico
Source: Frontiers journal article supplement (doi:10.3389/fmars.2021.664316), 2021-07-26
Supplement: Table_1.pdf [file Table_1.pdf]

Table S1. Sample metadata for juvenile bull sharks (*Carcharhinus leucas*) from northwest Gulf of Mexico estuaries. Xs in columns “Stomach Content Analysis” and “Stable Isotope Analysis” indicates analysis was performed for each sample.

| <b>Shark ID</b> | <b>Year</b> | <b>Season</b> | <b>Estuary</b> | <b>Region</b> | <b>Sex</b> | <b>Fork Length<br/>(cm)</b> | <b>Stomach<br/>Content Analysis</b> | <b>Stable Isotope<br/>Analysis</b> |
|-----------------|-------------|---------------|----------------|---------------|------------|-----------------------------|-------------------------------------|------------------------------------|
| Cleu_001        | 2013        | Fall          | Sabine Lake    | North         | Female     | 622                         | X                                   | X                                  |
| Cleu_002        | 2013        | Fall          | Sabine Lake    | North         | Male       | 682                         | X                                   | X                                  |
| Cleu_003        | 2013        | Fall          | Sabine Lake    | North         | Male       | 718                         | X                                   | X                                  |
| Cleu_004        | 2013        | Fall          | Sabine Lake    | North         | Male       | 730                         | X                                   | X                                  |
| Cleu_005        | 2013        | Fall          | Sabine Lake    | North         | Female     | 740                         | X                                   | X                                  |
| Cleu_006        | 2014        | Fall          | Sabine Lake    | North         | Male       | 682                         | X                                   | -                                  |
| Cleu_007        | 2014        | Fall          | Sabine Lake    | North         | Male       | 720                         | X                                   | -                                  |
| Cleu_008        | 2014        | Fall          | Sabine Lake    | North         | Male       | 759                         | X                                   | X                                  |
| Cleu_009        | 2014        | Fall          | Sabine Lake    | North         | Male       | 800                         | X                                   | X                                  |
| Cleu_010        | 2014        | Fall          | Sabine Lake    | North         | Male       | 954                         | X                                   | X                                  |
| Cleu_011        | 2014        | Fall          | Sabine Lake    | North         | Male       | 1017                        | X                                   | -                                  |
| Cleu_012        | 2014        | Spring        | Sabine Lake    | North         | Female     | 625                         | X                                   | -                                  |
| Cleu_013        | 2014        | Spring        | Sabine Lake    | North         | Female     | 642                         | X                                   | -                                  |
| Cleu_014        | 2014        | Spring        | Sabine Lake    | North         | Male       | 664                         | X                                   | -                                  |
| Cleu_015        | 2014        | Spring        | Sabine Lake    | North         | Male       | 713                         | X                                   | X                                  |
| Cleu_016        | 2014        | Spring        | Sabine Lake    | North         | Male       | 727                         | X                                   | -                                  |
| Cleu_017        | 2014        | Spring        | Sabine Lake    | North         | Male       | 738                         | X                                   | X                                  |
| Cleu_018        | 2014        | Spring        | Sabine Lake    | North         | Male       | 755                         | X                                   | -                                  |
| Cleu_019        | 2014        | Spring        | Sabine Lake    | North         | Male       | 762                         | X                                   | -                                  |
| Cleu_020        | 2014        | Spring        | Sabine Lake    | North         | Male       | 795                         | X                                   | X                                  |
| Cleu_021        | 2014        | Spring        | Sabine Lake    | North         | Female     | 856                         | X                                   | -                                  |
| Cleu_022        | 2015        | Fall          | Sabine Lake    | North         | Male       | 693                         | X                                   | X                                  |
| Cleu_023        | 2015        | Fall          | Sabine Lake    | North         | Male       | 718                         | X                                   | X                                  |
| Cleu_024        | 2015        | Fall          | Sabine Lake    | North         | Male       | 740                         | X                                   | X                                  |
| Cleu_025        | 2015        | Fall          | Sabine Lake    | North         | Female     | 792                         | X                                   | -                                  |
| Cleu_026        | 2015        | Fall          | Sabine Lake    | North         | Male       | 815                         | X                                   | -                                  |

|          |      |        |               |       |        |      |   |   |
|----------|------|--------|---------------|-------|--------|------|---|---|
| Cleu_027 | 2015 | Fall   | Sabine Lake   | North | Male   | 849  | X | X |
| Cleu_028 | 2015 | Spring | Sabine Lake   | North | Female | 751  | X | X |
| Cleu_029 | 2015 | Spring | Sabine Lake   | North | Male   | 790  | X | X |
| Cleu_030 | 2015 | Spring | Sabine Lake   | North | Male   | 851  | X | X |
| Cleu_031 | 2015 | Spring | Sabine Lake   | North | Female | 857  | X | - |
| Cleu_032 | 2015 | Spring | Sabine Lake   | North | Male   | 862  | X | - |
| Cleu_033 | 2015 | Spring | Sabine Lake   | North | Female | 874  | X | X |
| Cleu_034 | 2015 | Spring | Sabine Lake   | North | Female | 951  | X | - |
| Cleu_035 | 2015 | Spring | Sabine Lake   | North | Male   | 1003 | X | X |
| Cleu_036 | 2016 | Fall   | Sabine Lake   | North | Female | 596  | - | X |
| Cleu_037 | 2016 | Fall   | Sabine Lake   | North | Male   | 638  | X | X |
| Cleu_038 | 2016 | Fall   | Sabine Lake   | North | Female | 655  | X | - |
| Cleu_039 | 2016 | Fall   | Sabine Lake   | North | Male   | 664  | - | X |
| Cleu_040 | 2016 | Fall   | Sabine Lake   | North | Female | 684  | - | X |
| Cleu_041 | 2016 | Fall   | Sabine Lake   | North | Male   | 774  | - | X |
| Cleu_042 | 2016 | Fall   | Sabine Lake   | North | Female | 873  | - | X |
| Cleu_043 | 2016 | Fall   | Sabine Lake   | North | Male   | 910  | - | X |
| Cleu_044 | 2016 | Fall   | Sabine Lake   | North | Female | 1011 | X | X |
| Cleu_045 | 2016 | Spring | Sabine Lake   | North | Male   | 695  | X | - |
| Cleu_046 | 2016 | Spring | Sabine Lake   | North | Female | 700  | X | X |
| Cleu_047 | 2013 | Spring | Galveston Bay | North | Male   | 720  | X | - |
| Cleu_048 | 2013 | Spring | Galveston Bay | North | Male   | 720  | X | - |
| Cleu_049 | 2013 | Spring | Galveston Bay | North | Female | 728  | X | - |
| Cleu_050 | 2013 | Spring | Galveston Bay | North | Female | 768  | X | - |
| Cleu_051 | 2014 | Fall   | Galveston Bay | North | Male   | 614  | X | - |
| Cleu_052 | 2014 | Fall   | Galveston Bay | North | Female | 624  | X | - |
| Cleu_053 | 2014 | Fall   | Galveston Bay | North | Male   | 687  | X | X |
| Cleu_054 | 2014 | Fall   | Galveston Bay | North | Male   | 687  | X | - |
| Cleu_055 | 2014 | Fall   | Galveston Bay | North | Female | 690  | X | - |
| Cleu_056 | 2014 | Fall   | Galveston Bay | North | Male   | 696  | X | - |
| Cleu_057 | 2014 | Fall   | Galveston Bay | North | Male   | 715  | X | - |
| Cleu_058 | 2014 | Fall   | Galveston Bay | North | Female | 718  | X | - |

|          |      |        |               |       |        |      |   |   |
|----------|------|--------|---------------|-------|--------|------|---|---|
| Cleu_059 | 2014 | Fall   | Galveston Bay | North | Female | 726  | X | - |
| Cleu_060 | 2014 | Fall   | Galveston Bay | North | Female | 737  | X | - |
| Cleu_061 | 2014 | Fall   | Galveston Bay | North | Female | 738  | X | - |
| Cleu_062 | 2014 | Fall   | Galveston Bay | North | Male   | 739  | X | - |
| Cleu_063 | 2014 | Fall   | Galveston Bay | North | Male   | 883  | X | - |
| Cleu_064 | 2014 | Fall   | Galveston Bay | North | Female | 950  | X | X |
| Cleu_065 | 2014 | Fall   | Galveston Bay | North | Female | 987  | X | X |
| Cleu_066 | 2014 | Spring | Galveston Bay | North | Male   | 635  | X | X |
| Cleu_067 | 2014 | Spring | Galveston Bay | North | Female | 659  | X | - |
| Cleu_068 | 2014 | Spring | Galveston Bay | North | Male   | 696  | X | - |
| Cleu_069 | 2014 | Spring | Galveston Bay | North | Female | 723  | X | - |
| Cleu_070 | 2014 | Spring | Galveston Bay | North | Female | 725  | X | X |
| Cleu_071 | 2014 | Spring | Galveston Bay | North | Male   | 737  | X | X |
| Cleu_072 | 2014 | Spring | Galveston Bay | North | Male   | 744  | X | - |
| Cleu_073 | 2014 | Spring | Galveston Bay | North | Male   | 775  | X | - |
| Cleu_074 | 2014 | Spring | Galveston Bay | North | Female | 796  | X | X |
| Cleu_075 | 2014 | Spring | Galveston Bay | North | Male   | 807  | X | - |
| Cleu_076 | 2014 | Spring | Galveston Bay | North | Male   | 941  | X | - |
| Cleu_077 | 2014 | Spring | Galveston Bay | North | Female | 944  | X | - |
| Cleu_078 | 2014 | Spring | Galveston Bay | North | Male   | 1017 | X | X |
| Cleu_079 | 2015 | Fall   | Galveston Bay | North | Female | 669  | X | - |
| Cleu_080 | 2015 | Fall   | Galveston Bay | North | Female | 690  | X | X |
| Cleu_081 | 2015 | Fall   | Galveston Bay | North | Female | 709  | X | X |
| Cleu_082 | 2015 | Fall   | Galveston Bay | North | Female | 730  | X | - |
| Cleu_083 | 2015 | Fall   | Galveston Bay | North | Female | 735  | X | - |
| Cleu_084 | 2015 | Fall   | Galveston Bay | North | Male   | 736  | X | - |
| Cleu_085 | 2015 | Fall   | Galveston Bay | North | Female | 743  | X | - |
| Cleu_086 | 2015 | Fall   | Galveston Bay | North | Male   | 750  | X | X |
| Cleu_087 | 2015 | Fall   | Galveston Bay | North | Male   | 758  | X | - |
| Cleu_088 | 2015 | Fall   | Galveston Bay | North | Female | 767  | X | X |
| Cleu_089 | 2015 | Fall   | Galveston Bay | North | Female | 770  | X | - |
| Cleu_090 | 2015 | Fall   | Galveston Bay | North | Male   | 779  | X | - |

|          |      |        |               |       |        |      |   |   |
|----------|------|--------|---------------|-------|--------|------|---|---|
| Cleu_091 | 2015 | Fall   | Galveston Bay | North | Male   | 865  | X | X |
| Cleu_092 | 2015 | Fall   | Galveston Bay | North | Male   | 888  | X | X |
| Cleu_093 | 2015 | Spring | Galveston Bay | North | Female | 717  | X | X |
| Cleu_094 | 2015 | Spring | Galveston Bay | North | Female | 774  | X | - |
| Cleu_095 | 2015 | Spring | Galveston Bay | North | Male   | 790  | X | - |
| Cleu_096 | 2015 | Spring | Galveston Bay | North | Male   | 794  | X | X |
| Cleu_097 | 2015 | Spring | Galveston Bay | North | Female | 801  | X | X |
| Cleu_098 | 2015 | Spring | Galveston Bay | North | Female | 847  | X | - |
| Cleu_099 | 2015 | Spring | Galveston Bay | North | Female | 878  | X | - |
| Cleu_100 | 2015 | Spring | Galveston Bay | North | Male   | 884  | X | - |
| Cleu_101 | 2015 | Spring | Galveston Bay | North | Male   | 884  | X | - |
| Cleu_102 | 2015 | Spring | Galveston Bay | North | Female | 886  | X | - |
| Cleu_103 | 2015 | Spring | Galveston Bay | North | Male   | 1062 | X | X |
| Cleu_104 | 2016 | Fall   | Galveston Bay | North | Male   | 651  | X | X |
| Cleu_105 | 2016 | Fall   | Galveston Bay | North | Female | 655  | X | X |
| Cleu_106 | 2016 | Fall   | Galveston Bay | North | Male   | 683  | X | X |
| Cleu_107 | 2016 | Fall   | Galveston Bay | North | Male   | 705  | X | - |
| Cleu_108 | 2016 | Fall   | Galveston Bay | North | Male   | 723  | - | X |
| Cleu_109 | 2016 | Fall   | Galveston Bay | North | Female | 728  | X | X |
| Cleu_110 | 2016 | Spring | Galveston Bay | North | Male   | 549  | X | X |
| Cleu_111 | 2016 | Spring | Galveston Bay | North | Female | 686  | X | X |
| Cleu_112 | 2016 | Spring | Galveston Bay | North | Male   | 800  | X | X |
| Cleu_113 | 2016 | Spring | Galveston Bay | North | Male   | 842  | X | X |
| Cleu_114 | 2016 | Fall   | Sabine Lake   | South | Female | 710  | - | X |
| Cleu_115 | 2016 | Fall   | Sabine Lake   | South | Male   | 831  | X | - |
| Cleu_116 | 2016 | Fall   | Sabine Lake   | South | Female | 956  | X | - |
| Cleu_117 | 2013 | Fall   | Matagorda Bay | South | Male   | 585  | - | X |
| Cleu_118 | 2013 | Fall   | Matagorda Bay | South | Female | 638  | - | X |
| Cleu_119 | 2013 | Fall   | Matagorda Bay | South | Male   | 696  | - | X |
| Cleu_120 | 2013 | Fall   | Matagorda Bay | South | Male   | 701  | - | X |
| Cleu_121 | 2015 | Fall   | Matagorda Bay | South | Male   | 732  | X | X |
| Cleu_122 | 2015 | Fall   | Matagorda Bay | South | Female | 754  | X | X |

|          |      |        |               |       |        |      |   |   |
|----------|------|--------|---------------|-------|--------|------|---|---|
| Cleu_123 | 2015 | Fall   | Matagorda Bay | South | Male   | 758  | X | X |
| Cleu_124 | 2015 | Fall   | Matagorda Bay | South | Female | 793  | X | X |
| Cleu_125 | 2015 | Fall   | Matagorda Bay | South | Female | 900  | X | X |
| Cleu_126 | 2015 | Spring | Matagorda Bay | South | Female | 699  | X | X |
| Cleu_127 | 2015 | Spring | Matagorda Bay | South | Female | 745  | X | X |
| Cleu_128 | 2015 | Spring | Matagorda Bay | South | Female | 775  | X | X |
| Cleu_129 | 2015 | Spring | Matagorda Bay | South | Male   | 865  | X | X |
| Cleu_130 | 2016 | Fall   | Matagorda Bay | South | Female | 648  | X | X |
| Cleu_131 | 2016 | Fall   | Matagorda Bay | South | Male   | 680  | X | X |
| Cleu_132 | 2016 | Fall   | Matagorda Bay | South | Male   | 709  | X | X |
| Cleu_133 | 2016 | Fall   | Matagorda Bay | South | Male   | 725  | X | - |
| Cleu_134 | 2016 | Fall   | Matagorda Bay | South | Male   | 731  | X | - |
| Cleu_135 | 2016 | Fall   | Matagorda Bay | South | Male   | 787  | X | - |
| Cleu_136 | 2016 | Fall   | Matagorda Bay | South | Male   | 837  | X | X |
| Cleu_137 | 2016 | Fall   | Matagorda Bay | South | Male   | 842  | X | - |
| Cleu_138 | 2016 | Fall   | Matagorda Bay | South | Female | 900  | X | X |
| Cleu_139 | 2016 | Fall   | Matagorda Bay | South | Female | 937  | X | - |
| Cleu_140 | 2016 | Fall   | Matagorda Bay | South | Male   | 954  | X | X |
| Cleu_141 | 2016 | Spring | Matagorda Bay | South | Male   | 619  | X | X |
| Cleu_142 | 2016 | Spring | Matagorda Bay | South | Female | 802  | X | X |
| Cleu_143 | 2016 | Spring | Matagorda Bay | South | Female | 926  | X | - |
| Cleu_144 | 2016 | Spring | Matagorda Bay | South | Male   | 947  | X | - |
| Cleu_145 | 2016 | Spring | Matagorda Bay | South | Female | 948  | X | X |
| Cleu_146 | 2016 | Spring | Matagorda Bay | South | Female | 1183 | - | X |
| Cleu_147 | 2013 | Fall   | Aransas Bay   | South | Female | 631  | X | X |
| Cleu_148 | 2013 | Fall   | Aransas Bay   | South | Female | 694  | X | X |
| Cleu_149 | 2013 | Fall   | Aransas Bay   | South | Male   | 702  | X | X |
| Cleu_150 | 2013 | Fall   | Aransas Bay   | South | Female | 731  | X | X |
| Cleu_151 | 2014 | Fall   | Aransas Bay   | South | Female | 648  | X | X |
| Cleu_152 | 2014 | Fall   | Aransas Bay   | South | Female | 679  | X | - |
| Cleu_153 | 2014 | Fall   | Aransas Bay   | South | Male   | 680  | X | - |
| Cleu_154 | 2014 | Fall   | Aransas Bay   | South | Female | 681  | X | - |

|          |      |        |             |       |        |      |   |   |
|----------|------|--------|-------------|-------|--------|------|---|---|
| Cleu_155 | 2014 | Fall   | Aransas Bay | South | Male   | 682  | X | - |
| Cleu_156 | 2014 | Fall   | Aransas Bay | South | Female | 697  | X | - |
| Cleu_157 | 2014 | Fall   | Aransas Bay | South | Male   | 713  | X | - |
| Cleu_158 | 2014 | Fall   | Aransas Bay | South | Male   | 720  | X | - |
| Cleu_159 | 2014 | Fall   | Aransas Bay | South | Female | 722  | X | - |
| Cleu_160 | 2014 | Fall   | Aransas Bay | South | Male   | 723  | X | - |
| Cleu_161 | 2014 | Fall   | Aransas Bay | South | Male   | 728  | X | - |
| Cleu_162 | 2014 | Fall   | Aransas Bay | South | Female | 739  | X | - |
| Cleu_163 | 2014 | Fall   | Aransas Bay | South | Male   | 744  | X | - |
| Cleu_164 | 2014 | Fall   | Aransas Bay | South | Male   | 746  | X | X |
| Cleu_165 | 2014 | Fall   | Aransas Bay | South | Female | 764  | X | - |
| Cleu_166 | 2014 | Fall   | Aransas Bay | South | Female | 893  | X | - |
| Cleu_167 | 2014 | Fall   | Aransas Bay | South | Male   | 1104 | X | X |
| Cleu_168 | 2014 | Spring | Aransas Bay | South | Male   | 595  | X | - |
| Cleu_169 | 2014 | Spring | Aransas Bay | South | Male   | 615  | X | X |
| Cleu_170 | 2014 | Spring | Aransas Bay | South | Female | 684  | X | - |
| Cleu_171 | 2014 | Spring | Aransas Bay | South | Male   | 686  | X | - |
| Cleu_172 | 2014 | Spring | Aransas Bay | South | Male   | 710  | X | - |
| Cleu_173 | 2014 | Spring | Aransas Bay | South | Female | 713  | X | - |
| Cleu_174 | 2014 | Spring | Aransas Bay | South | Male   | 727  | X | - |
| Cleu_175 | 2014 | Spring | Aransas Bay | South | Female | 734  | X | - |
| Cleu_176 | 2014 | Spring | Aransas Bay | South | Female | 748  | X | X |
| Cleu_177 | 2014 | Spring | Aransas Bay | South | Female | 770  | X | - |
| Cleu_178 | 2014 | Spring | Aransas Bay | South | Male   | 813  | X | X |
| Cleu_179 | 2014 | Spring | Aransas Bay | South | Male   | 863  | X | - |
| Cleu_180 | 2014 | Spring | Aransas Bay | South | Male   | 894  | X | X |
| Cleu_181 | 2014 | Spring | Aransas Bay | South | Male   | 904  | X | X |
| Cleu_182 | 2014 | Spring | Aransas Bay | South | Female | 930  | X | - |
| Cleu_183 | 2014 | Spring | Aransas Bay | South | Male   | 994  | X | X |
| Cleu_184 | 2014 | Spring | Aransas Bay | South | Female | 1020 | X | X |
| Cleu_185 | 2015 | Fall   | Aransas Bay | South | Female | 1010 | X | - |
| Cleu_186 | 2015 | Spring | Aransas Bay | South | Female | 551  | X | X |

|          |      |        |                    |       |        |     |   |   |
|----------|------|--------|--------------------|-------|--------|-----|---|---|
| Cleu_187 | 2015 | Spring | Aransas Bay        | South | Female | 606 | X | X |
| Cleu_188 | 2015 | Spring | Aransas Bay        | South | Male   | 608 | X | X |
| Cleu_189 | 2015 | Spring | Aransas Bay        | South | Female | 684 | X | X |
| Cleu_190 | 2015 | Spring | Aransas Bay        | South | Female | 690 | X | X |
| Cleu_191 | 2015 | Spring | Aransas Bay        | South | Male   | 710 | X | X |
| Cleu_192 | 2015 | Spring | Aransas Bay        | South | Male   | 775 | X | X |
| Cleu_193 | 2015 | Spring | Aransas Bay        | South | Female | 778 | X | X |
| Cleu_194 | 2015 | Spring | Aransas Bay        | South | Female | 813 | X | X |
| Cleu_195 | 2015 | Spring | Aransas Bay        | South | Female | 837 | X | X |
| Cleu_196 | 2016 | Fall   | Aransas Bay        | South | Male   | 684 | X | - |
| Cleu_197 | 2016 | Fall   | Aransas Bay        | South | Male   | 728 | X | - |
| Cleu_198 | 2016 | Fall   | Aransas Bay        | South | Male   | 739 | X | X |
| Cleu_199 | 2016 | Fall   | Aransas Bay        | South | Female | 755 | X | X |
| Cleu_200 | 2016 | Fall   | Aransas Bay        | South | Female | 765 | X | X |
| Cleu_201 | 2016 | Fall   | Aransas Bay        | South | Male   | 794 | X | - |
| Cleu_202 | 2016 | Fall   | Aransas Bay        | South | Female | 802 | X | - |
| Cleu_203 | 2016 | Fall   | Aransas Bay        | South | Male   | 804 | X | X |
| Cleu_204 | 2016 | Fall   | Aransas Bay        | South | Male   | 813 | X | - |
| Cleu_205 | 2016 | Fall   | Aransas Bay        | South | Female | 824 | X | - |
| Cleu_206 | 2016 | Spring | Aransas Bay        | South | Female | 626 | X | X |
| Cleu_207 | 2016 | Spring | Aransas Bay        | South | Male   | 835 | X | - |
| Cleu_208 | 2016 | Spring | Aransas Bay        | South | Female | 845 | X | X |
| Cleu_209 | 2016 | Spring | Aransas Bay        | South | Female | 932 | X | X |
| Cleu_210 | 2014 | Fall   | Corpus Christi Bay | South | Female | 703 | X | X |
| Cleu_211 | 2014 | Fall   | Corpus Christi Bay | South | Female | 730 | X | X |
| Cleu_212 | 2014 | Fall   | Corpus Christi Bay | South | Male   | 738 | X | - |
| Cleu_213 | 2014 | Fall   | Corpus Christi Bay | South | Female | 751 | X | X |
| Cleu_214 | 2014 | Fall   | Corpus Christi Bay | South | Female | 835 | X | - |
| Cleu_215 | 2014 | Fall   | Corpus Christi Bay | South | Female | 852 | X | X |
| Cleu_216 | 2014 | Fall   | Corpus Christi Bay | South | Female | 889 | X | X |
| Cleu_217 | 2014 | Spring | Corpus Christi Bay | South | Female | 773 | X | X |
| Cleu_218 | 2014 | Spring | Corpus Christi Bay | South | Male   | 951 | X | X |

|          |      |        |                    |       |        |      |   |   |
|----------|------|--------|--------------------|-------|--------|------|---|---|
| Cleu_219 | 2015 | Spring | Corpus Christi Bay | South | Male   | 550  | X | X |
| Cleu_220 | 2015 | Spring | Corpus Christi Bay | South | Female | 572  | X | X |
| Cleu_221 | 2015 | Spring | Corpus Christi Bay | South | Female | 583  | X | - |
| Cleu_222 | 2015 | Spring | Corpus Christi Bay | South | Female | 597  | X | - |
| Cleu_223 | 2015 | Spring | Corpus Christi Bay | South | Male   | 598  | X | - |
| Cleu_224 | 2015 | Spring | Corpus Christi Bay | South | Female | 598  | X | - |
| Cleu_225 | 2015 | Spring | Corpus Christi Bay | South | Female | 602  | X | X |
| Cleu_226 | 2015 | Spring | Corpus Christi Bay | South | Male   | 614  | X | X |
| Cleu_227 | 2015 | Spring | Corpus Christi Bay | South | Male   | 732  | X | X |
| Cleu_228 | 2015 | Spring | Corpus Christi Bay | South | Female | 739  | X | - |
| Cleu_229 | 2015 | Spring | Corpus Christi Bay | South | Female | 766  | X | - |
| Cleu_230 | 2015 | Spring | Corpus Christi Bay | South | Male   | 780  | X | X |
| Cleu_231 | 2015 | Spring | Corpus Christi Bay | South | Female | 968  | X | X |
| Cleu_232 | 2015 | Spring | Corpus Christi Bay | South | Female | 1034 | X | X |
| Cleu_233 | 2015 | Spring | Corpus Christi Bay | South | Male   | 1092 | X | X |
| Cleu_234 | 2015 | Spring | Corpus Christi Bay | South | Female | 1145 | X | X |
| Cleu_235 | 2016 | Fall   | Corpus Christi Bay | South | Male   | 784  | - | X |
| Cleu_236 | 2016 | Fall   | Corpus Christi Bay | South | Female | 796  | X | X |
| Cleu_237 | 2016 | Spring | Corpus Christi Bay | South | Male   | 632  | X | X |
| Cleu_238 | 2016 | Spring | Corpus Christi Bay | South | Male   | 835  | X | X |
| Cleu_239 | 2014 | Spring | Lower Laguna Madre | South | Male   | 687  | X | - |
| Cleu_240 | 2013 | Fall   | San Antonio Bay    | South | Male   | 726  | - | X |
| Cleu_241 | 2013 | Fall   | San Antonio Bay    | South | Male   | 726  | - | X |
| Cleu_242 | 2013 | Fall   | San Antonio Bay    | South | Female | 739  | - | X |
| Cleu_243 | 2013 | Fall   | San Antonio Bay    | South | Female | 772  | - | X |
| Cleu_244 | 2013 | Fall   | San Antonio Bay    | South | Male   | 848  | - | X |
| Cleu_245 | 2013 | Fall   | San Antonio Bay    | South | Male   | 875  | X | X |
| Cleu_246 | 2014 | Spring | Upper Laguna Madre | South | Female | 960  | X | - |
